# Supplementary material
Source: Springer Nature journal article supplement (https://www.springermedizin.de/resource/supplementary/12960_2010_251_MOESM3_ESM.pdf/9570746)
Supplement: MOESM3 [file 9570746]

Baseline: Current supply of  
doctors stratified by sex and  
age (2008)
